# Supplementary material for: APTES-Based Silica Nanoparticles as a Potential Modifier for the Selective Sequestration of CO2 Gas Molecules
Source: MDPI journal article supplement (doi:10.3390/nano11112893), 2021-10-29
Supplement: s1 [file s1]

Supporting information  
for

# APTES based silica nanoparticles as a potential modifier for the selective sequestration of CO<sub>2</sub> gas molecules

Eduardo J. Cueto-Díaz<sup>1,\*</sup>, Alberto Castro Muñiz<sup>2</sup>, Fabián Suárez-García<sup>2</sup>, Santos Gálvez-Martínez<sup>1</sup>, M<sup>a</sup> Carmen Torquemada-Vico<sup>3</sup>, M<sup>a</sup> Pilar Valles González<sup>4</sup> and Eva Mateo-Martí<sup>1</sup>.

<sup>1</sup>Centro de Astrobiología, (INTA-CSIC), Ctra. Ajalvir, Km. 4, 28850, Torrejón de Ardoz, Madrid, Spain; sgálvez@cab.inta-csic.es (S.G.-M.); mateome@cab.inta-csic.es (E.M.-M.)

<sup>2</sup>Instituto de Ciencia y Tecnología del Carbono (INCAR-CSIC), C/ Francisco Pintado Fe, 26, 33011 Oviedo, Spain; alberto@incar.csic.es (A.C.M.); fabian@incar.csic.es (F.S.-G.)

<sup>3</sup>Departamento de Óptica Espacial, Instituto Nacional de Técnica Aeroespacial, Ctra. Ajalvir, Km. 4, 28850, Torrejón de Ardoz, Madrid, Spain; torquemadavm@inta.es

<sup>4</sup>Departamento de Materiales y Estructuras, Instituto Nacional de Técnica Aeroespacial, Ctra. Ajalvir, Km. 4, 28850, Torrejón de Ardoz, Madrid, Spain; vallesgp@inta.es

\* Correspondence: ecueto@cab.inta-csic.es

## Table of Contents

|                                                    |      |
|----------------------------------------------------|------|
| A. Heat of adsorption                              | p. 1 |
| B. CO <sub>2</sub> adsorption/desorption isotherms | p. 2 |
| C. FT-IR spectra                                   | p. 3 |
| D. Selectivity                                     | p. 3 |
| E. References                                      | p. 6 |

## 1. Heat of adsorption

Isosteric heat (enthalpy in this case) of adsorption was calculated using the Virial equation. This method involved the simultaneous fit of two adsorption isotherms with the same fitting parameters  $a_i$  and  $b_j$  (see equation 1). The number of fitting parameters must also be optimized during the fit. So, several simulations have to be carried out in order to achieve the optimum fitting trying to use the minimum number of  $a_i$  and  $b_j$  parameters. In practice, five  $a_i$  and two  $b_j$  parameters are a good option to start for the fit and more parameters should be added until the final fit does not improve more [1,2].

$$\ln P = \ln n + \frac{1}{T} \sum_{i=0}^m a_i n^i + \sum_{j=0}^n b_j n^j \quad (\text{S1})$$

Where, P is the pressure, n in the adsorbed amount, T is the temperature and  $a_i$  and  $b_j$  are the fitting parameters.

The isosteric heat of adsorption ( $Q_{st}$ ) can be calculated from the  $a_i$  parameters (Equation 2):

$$Q_{st} = -R \sum_{i=0}^m a_i n^i \quad (\text{S2})$$



# APTES@SiO<sub>2</sub>(200nm)

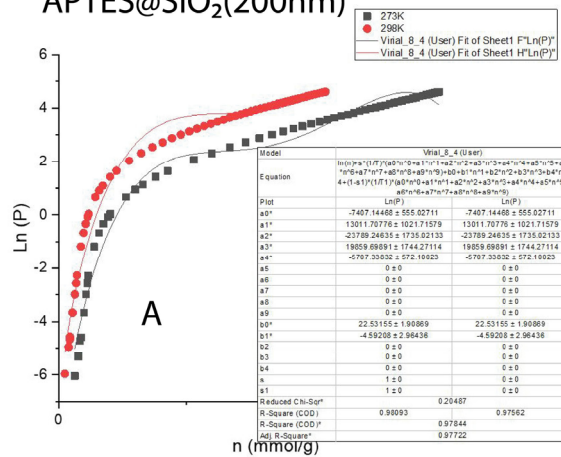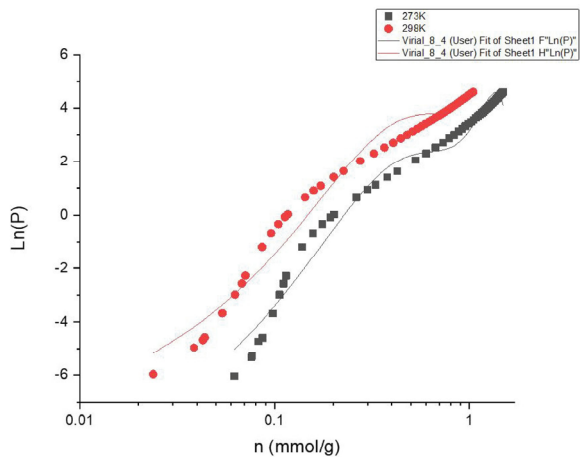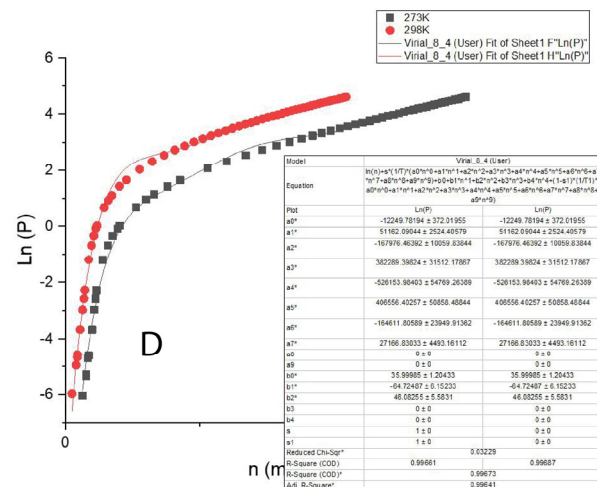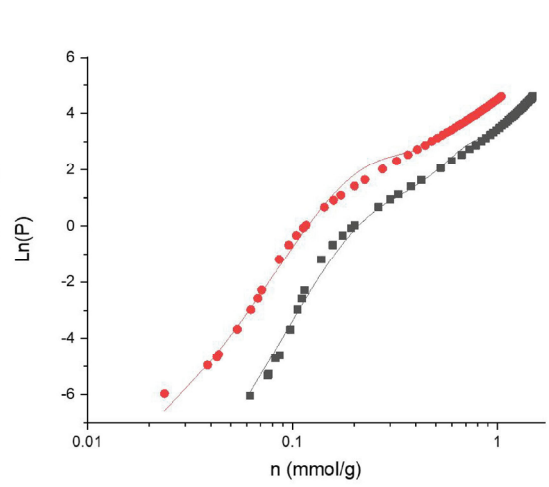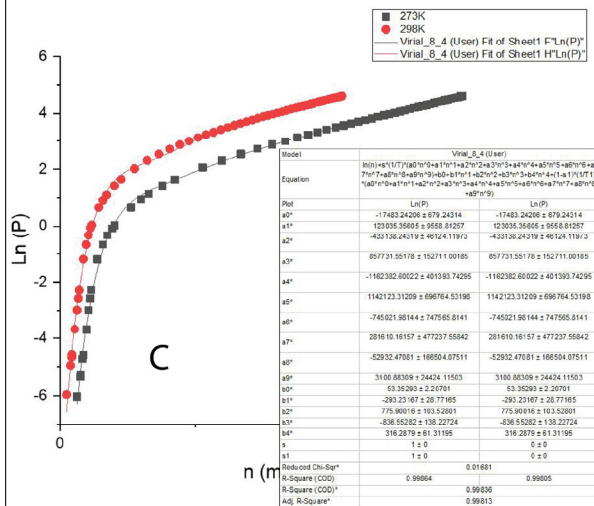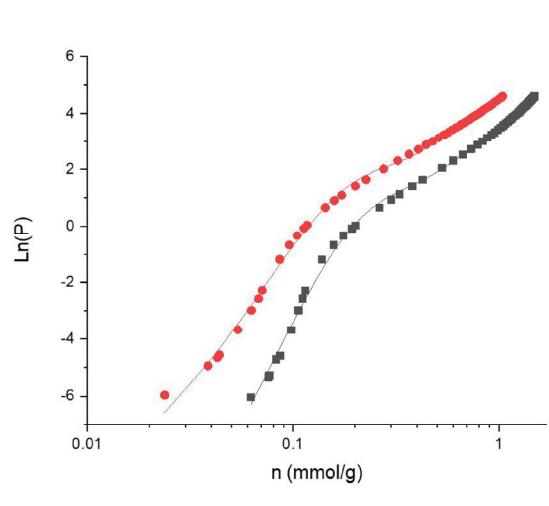



## 2. CO<sub>2</sub> adsorption/desorption isotherms

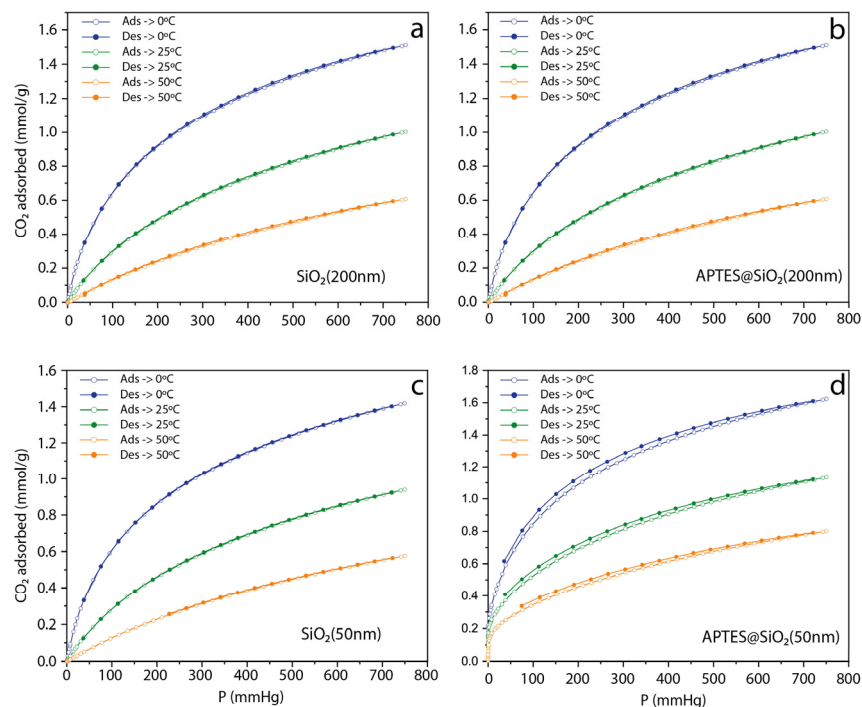

**Figure S2.** CO<sub>2</sub> adsorption/desorption isotherms at 0, 25 and 50°C for pristine and functionalized SiO<sub>2</sub> nanoparticles of 50 and 200 nm.

## 3. FT-IR spectra

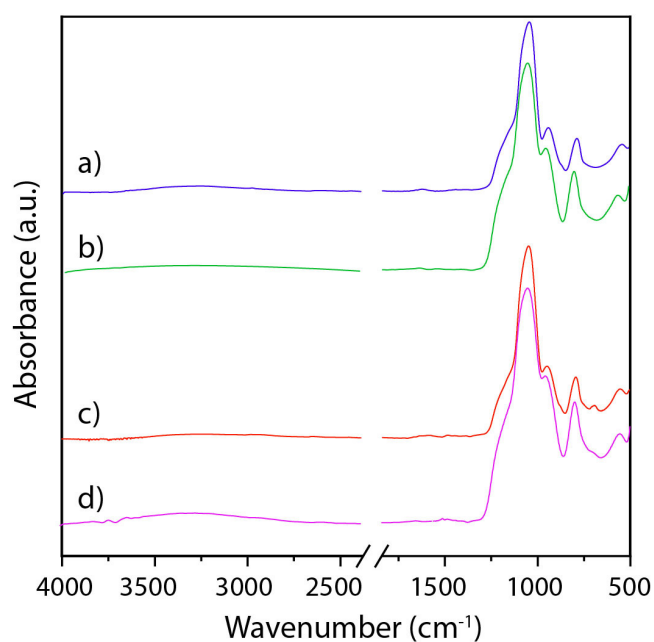

**Figure S3.** IR spectra of 50 nm size (a,b) SiO<sub>2</sub>(50nm), before (navy blue) and after (green) CO<sub>2</sub>/N<sub>2</sub> cycles, and (c,d) SiO<sub>2</sub>(50nm)@APTES, before (red) and after (pink) CO<sub>2</sub>/N<sub>2</sub> cycles.

## 4. Selectivity

**Table S1.** Henry's constants corresponding to the lineal fit of the N<sub>2</sub> adsorption isotherms at 25 and 50°C on pristine and functionalized SiO<sub>2</sub> nanoparticles of 50 and 200 nm of size.

| Sample | N <sub>2</sub> at 25°C | N <sub>2</sub> at 50°C |
|--------|------------------------|------------------------|
|--------|------------------------|------------------------|

|                                | $K_H$<br>(mmol/g/mmHg) | $R^2$  | $K_H$<br>(mmol/g/mmHg) | $R^2$  |
|--------------------------------|------------------------|--------|------------------------|--------|
| SiO <sub>2</sub> (200nm)       | $5.43 \cdot 10^{-5}$   | 0.9999 | $3.07 \cdot 10^{-5}$   | 0.9949 |
| SiO <sub>2</sub> (200nm)@APTES | $5.63 \cdot 10^{-5}$   | 0.9970 | $2.93 \cdot 10^{-5}$   | 0.9905 |
| SiO <sub>2</sub> (50nm)        | $6.82 \cdot 10^{-5}$   | 0.9999 | $3.94 \cdot 10^{-5}$   | 0.9999 |
| SiO <sub>2</sub> (50nm)@APTES  | $4.94 \cdot 10^{-5}$   | 0.9927 | $3.25 \cdot 10^{-5}$   | 0.9744 |

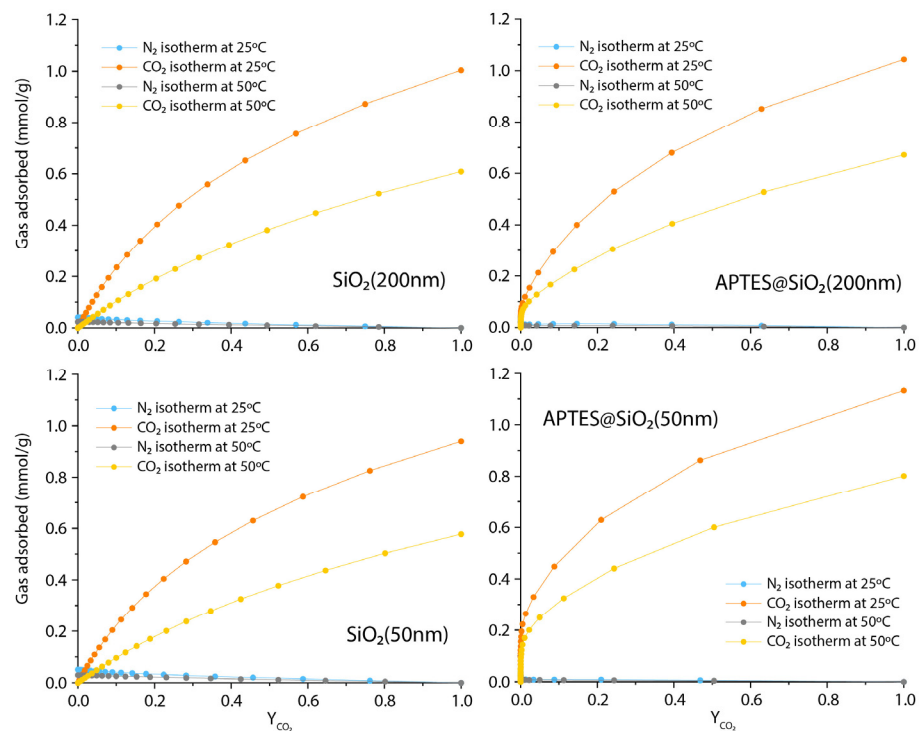

**Figure S4.** Prediction of the amount of CO<sub>2</sub> and N<sub>2</sub> adsorbed as a function of the CO<sub>2</sub> mole fraction in the gas phase ( $y_{CO_2}$ ) in CO<sub>2</sub>/N<sub>2</sub> mixtures at 750 mmHg and at 25 and 50°C.

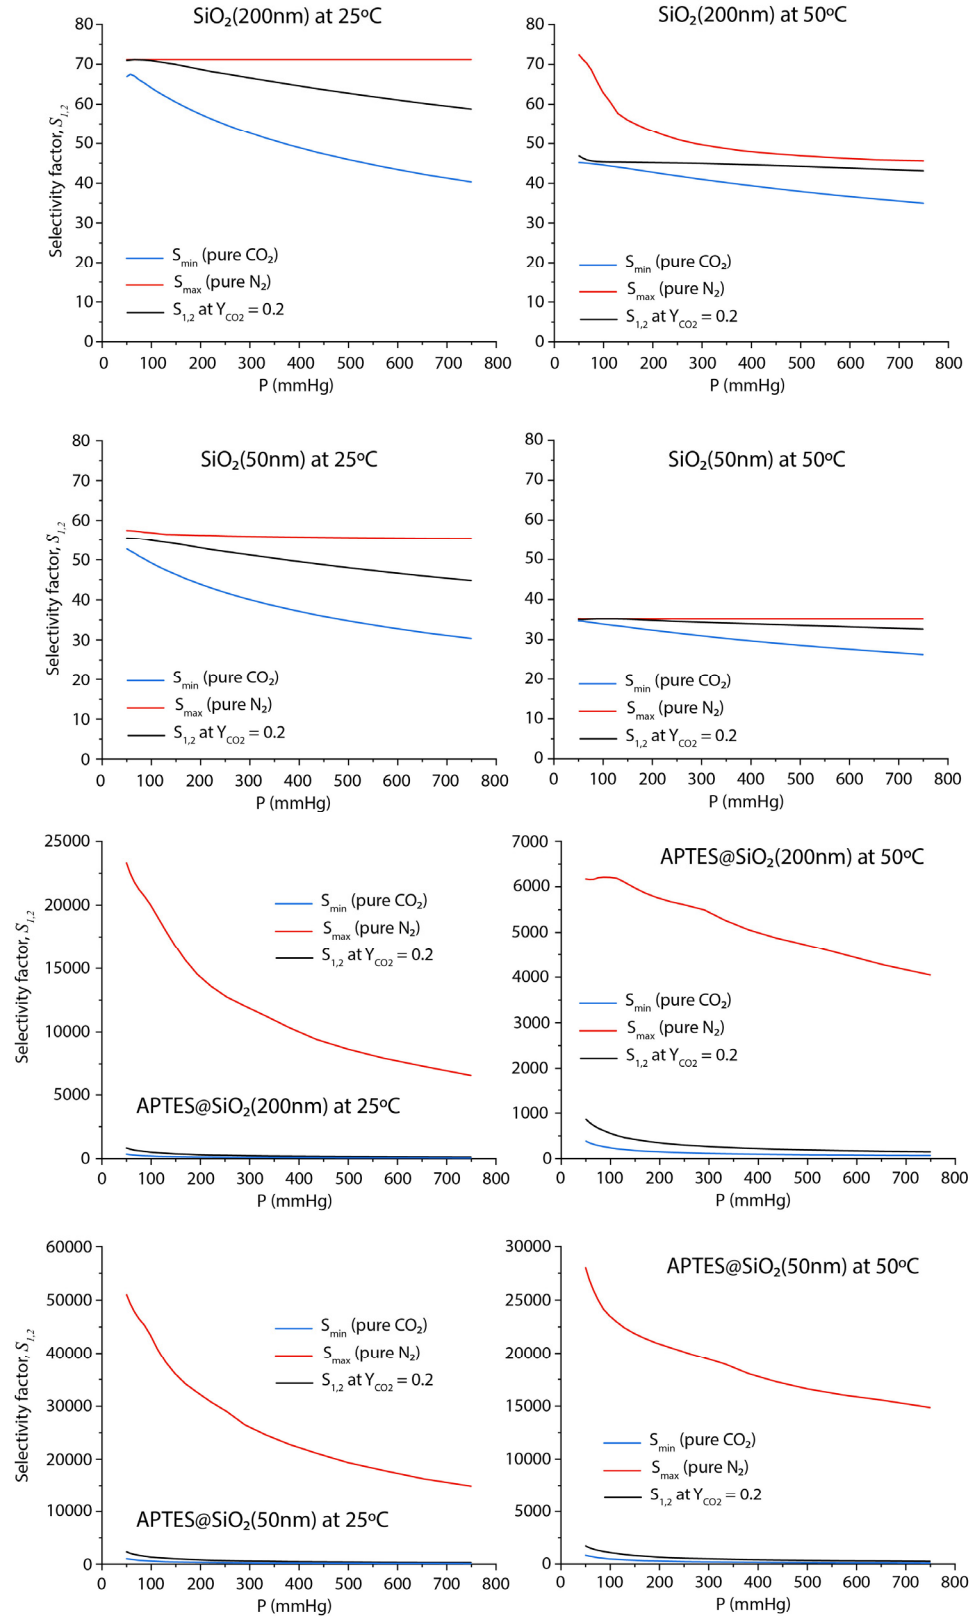

**Figure S5.** Variation of the selectivity factors,  $S_{1,2}$ , of  $\text{CO}_2$  over  $\text{N}_2$  in a mixture of both gases as function of the gas composition at 25 and 50°C and different pressures.  $S_{\min}$  = minimum value of  $S_{1,2}$  at  $y_{\text{CO}_2} = 1$  and  $S_{\max}$  = maximum value of  $S_{1,2}$  at  $y_{\text{CO}_2} = 0$ .

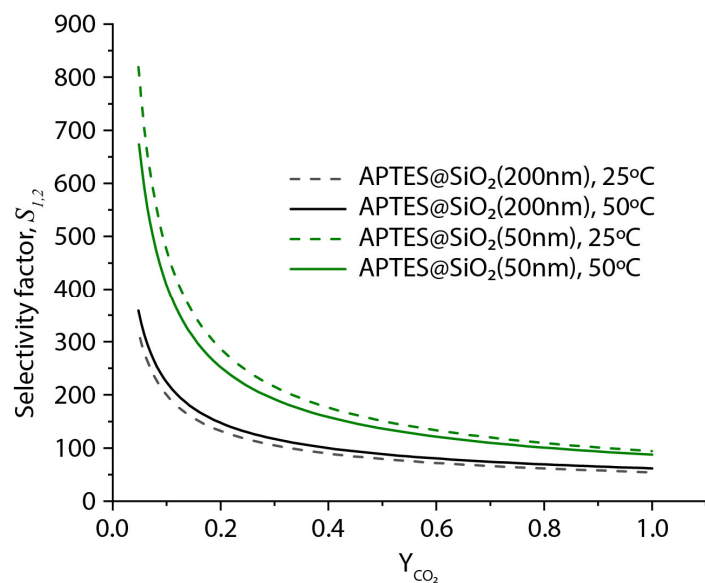

**Figure S6.** Variation of the selectivity factors  $S_{1,2}$ , of CO<sub>2</sub> over N<sub>2</sub> as function of the mole fraction of CO<sub>2</sub> ( $y_{CO_2}$ ) at 750 mmHg and at 25 (dashed line) and 50°C (solid line) on the functionalized nanoparticles.

## References

1. Czepirski, L.; JagieŁŁo, J. Virial-type thermal equation of gas—solid adsorption. *Chemical Engineering Science* **1989**, *44*, 797-801, doi:[https://doi.org/10.1016/0009-2509\(89\)85253-4](https://doi.org/10.1016/0009-2509(89)85253-4).
2. Nuhnen, A.; Janiak, C. A practical guide to calculate the isosteric heat/enthalpy of adsorption via adsorption isotherms in metal–organic frameworks, MOFs. *Dalton Transactions* **2020**, *49*, 10295-10307, doi:10.1039/D0DT01784A.
